# Supplementary material
Source: ML conference proceedings conference paper supplement (https://openreview.net/forum?id=8JLmTZsxGh)
Supplement: supplementary_material [file attachment]

## 375 A Appendix

### 376 A.1 Reference Control

The reference control for the (DI) obeys the PID control law

$$u_{nom}(t) = K_p e(t) + K_i \int_0^t e(\tau) d\tau + K_d \frac{de(t)}{dt}$$

377 where  $e(t)$  is the error between the current state and the target state at time  $t$ . For our experiments,  
 378 we use the gains  $K_p^x = -1.2$ ,  $K_p^v = -2.0$ ,  $K_d^x = 0.1$ ,  $K_d^v = 0.1$  with  $K_i^x = K_i^v = 0$ .

379 For (F16), we hand-design a reference control policy resembling takeoff. To test the PINN-CBF  
 380 filtering abilities, we obstruct the trajectory with rectangular obstacles and place walls to restrict the  
 381 safe spatial coordinates to a box. In Figure 8, filtering demonstrates agile planning and obstacle  
 382 avoidance. The following is an example control policy for takeoff while banking.

$$A_T(t) = \frac{a}{8}t + 1, \quad P(t) = \frac{p}{4} \sin(2t), \quad Q(t) = \frac{q}{5} \cos(t), \quad x(0) = [0, 1, 2, 0, 0, \pi, 1]$$

### 383 A.2 3D Dubins Fixed-Wing Aircraft System Dynamics

384 Following [41], the dynamics of the Dubins fixed-wing aircraft (F16) system is given by:

$$\begin{aligned} \dot{n} &= V_T \cos \psi \cos \theta, & \dot{e} &= V_T \sin \psi \cos \theta, \\ \dot{d} &= -V_T \sin \theta, & \dot{\phi} &= P + \sin \phi \tan \theta Q + \cos \phi \tan \theta R, \\ \dot{\theta} &= \cos \phi Q - \sin \phi R, & \dot{\psi} &= \frac{\sin \phi}{\cos \theta} Q + \frac{\cos \phi}{\cos \theta} R, \\ \dot{V}_T &= A_T, & R &= \frac{g_D}{V_T} \sin \phi \cos \theta \end{aligned} \tag{13}$$

385 where  $[n \ e \ d \ \phi \ \theta \ \psi \ V_T]^\top$  are the states and  $[A_T \ P \ Q]^T$  are the controls. In particular,  $n, e, d$  are the  
 386 position coordinates,  $V_T$  is the tangential velocity of the aircraft,  $\phi, \theta, \psi$  are the Euler coordinates  
 387 orienting the plane,  $A_T$  is the tangential acceleration control input,  $P$  and  $Q$  are rotational control  
 388 inputs, and  $g_D$  is gravitational acceleration.
